# Supplementary material
Source: Springer Nature journal article supplement (https://www.springermedizin.de/resource/supplementary/12885_2011_2990_MOESM3_ESM.pdf/9462428)

HGT-1

L50

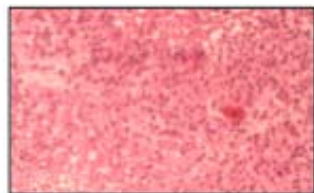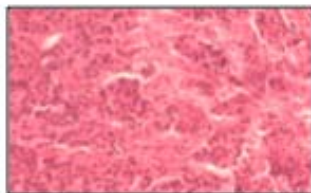

Histology

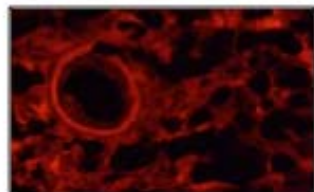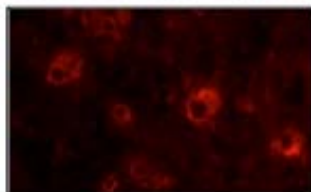

Laminin 332

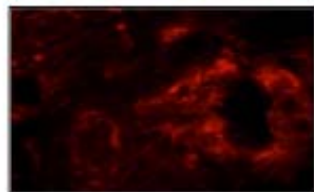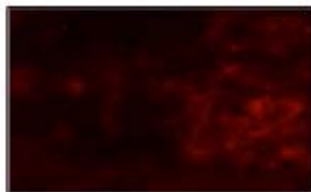

VEGF

Supplement: MOESM3 [file 9462428]
